# Supplementary material for: Silver nanocube aggregation gradient materials in search for total internal reflection with high phase sensitivity
Source: Royal Society of Chemistry journal article supplement (doi:10.1039/c4nr06430e), 2015-01-01
Supplement: c4nr06430e1.pdf [file c4nr06430e1.pdf]

**Supporting Information**

**Silver Nanocube Aggregation Gradient Materials in  
Search for Total Internal Reflection  
with High Phase Sensitivity**

*Tobias A.F. König,<sup>a,c</sup> Petr A. Ledin,<sup>a</sup> Michael Russell,<sup>a</sup> Jeff. A. Geldmeier,<sup>a</sup> Mahmoud.  
A. Mahmoud,<sup>b</sup> Mostafa A. El-Sayed,<sup>b</sup> and Vladimir V. Tsukruk<sup>\*,a</sup>*

<sup>a</sup> School of Materials Science and Engineering,  
Georgia Institute of Technology,  
Atlanta, Georgia 30332-0245 (USA)

<sup>b</sup> Laser Dynamics Laboratory, School of Chemistry and Biochemistry,  
Georgia Institute of Technology,  
Atlanta, Georgia 30332-0400 (USA)

<sup>c</sup> Current address:  
Physical Chemistry II,  
University of Bayreuth,  
95440 Bayreuth (Germany)

\*Corresponding e-mail: [vladimir@mse.gatech.edu](mailto:vladimir@mse.gatech.edu)

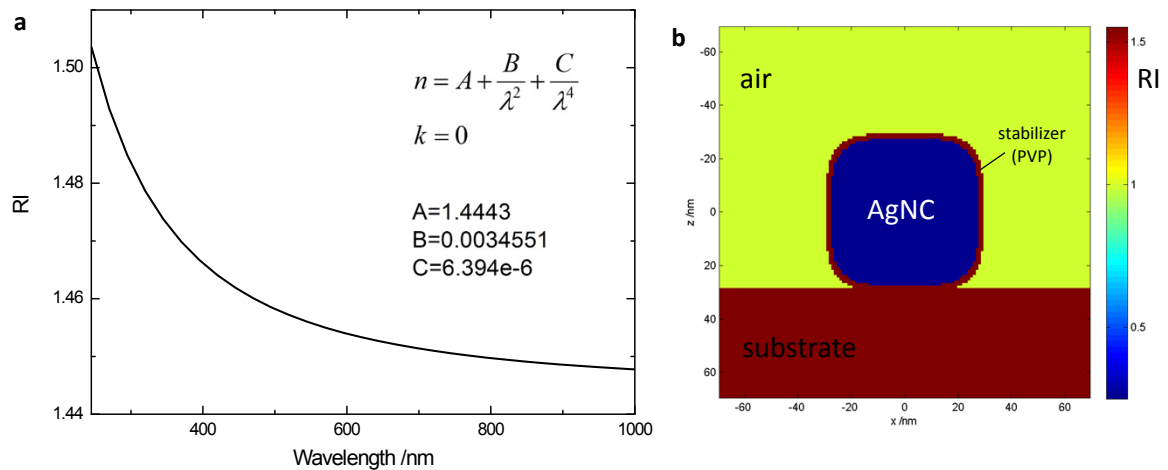

**Figure S1:** (a) Refractive index ( $n$ ) of quartz glass (purchased from ChemGlass) as determined from ellipsometry data by Cauchy model (units for  $\lambda$  in  $\mu\text{m}$ ). (b) Measured substrate refractive index inside the simulation setup shown with a silver nanocube coated with 2 nm stabilizers and 25% edge/corner rounding. Refractive index cross-section image at 400 nm wavelength and 1 nm mesh size (image resolution).

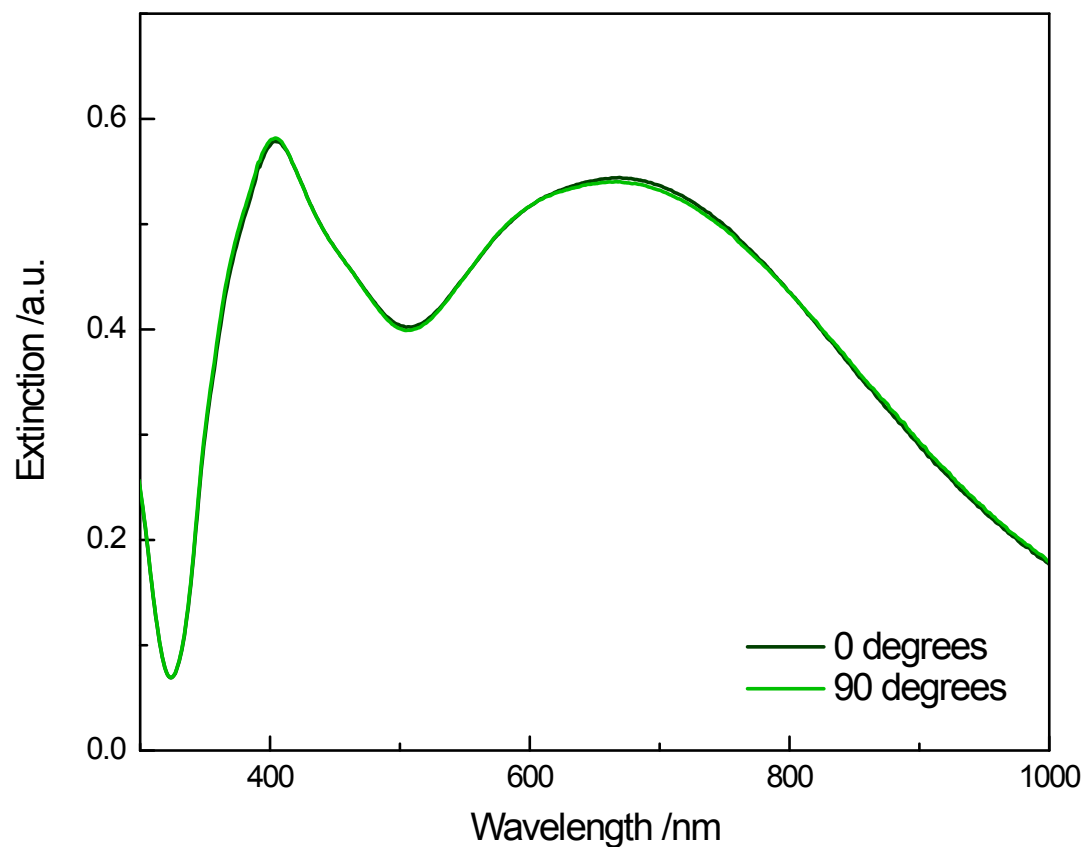

**Figure S2:** UV-Vis measurement of the 12 mN/m sample in two different mounting condition relative to the incoming light (rotation axis).

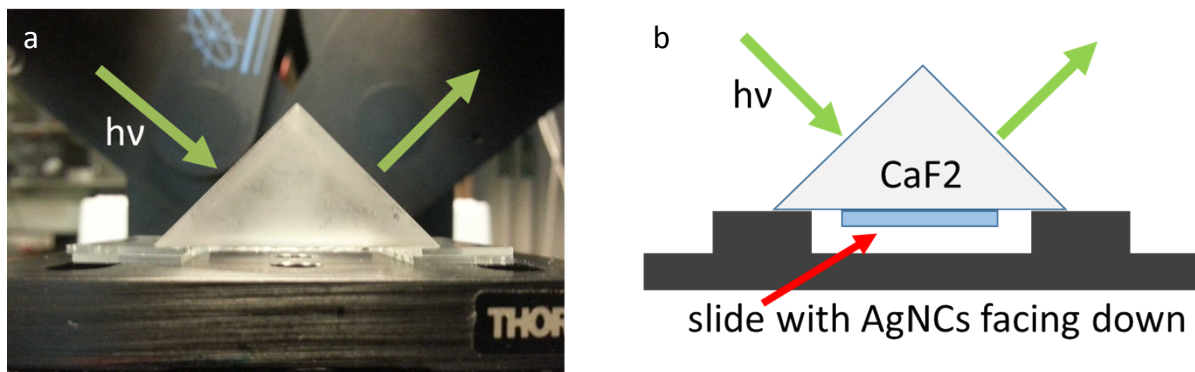

**Figure S3:** (a) photograph of total internal reflection measurement on spectral ellipsometer and (b) schematic of experimental apparatus.

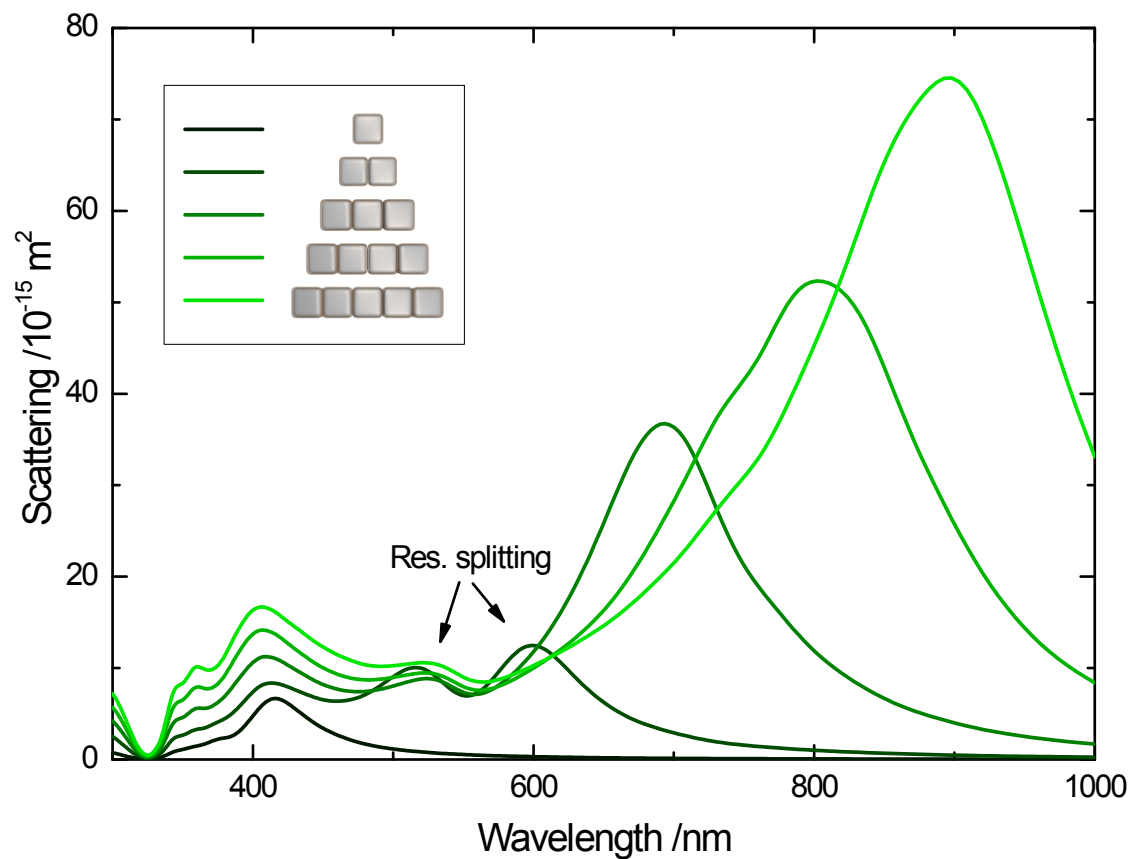

**Figure S4:** Simulated scattering cross-sections of different aggregation types at an inter-particle spacing of 2 nm.
